# Supplementary material for: Machine Learning Based Algorithms to Impute PaO 2 from SpO2 Values and Development of an Online Calculator
Source: Research Square preprint supplement (doi:10.21203/rs.3.rs-1053360/v1), 2021-11-11
Supplement: Supplementary file 1 [file 056c92dd778b08dadafc280d.docx]

**Supplementary Materials:**

**Supplementary Tables:**

| Total ICU events, N | 9,900 |
| --- | --- |
| Female sex, n (%) | 3,713 (37.5) |
| Age in years, mean (+ SD)* | 64.0 (+ 16) |
| PaO2/FIO2, mean (+ SD) | 322.8 (+193.0) |
|  |  |
| Available mean PaO2/FIO2, N | 9,900 |
| PaO2/FIO2 > 300, n | 4,656 |
| PaO2/FIO2 = 201-300, n | 2,468 |
| PaO2/FIO2 = 101-200, n | 2,042 |
| PaO2/FIO2 < 100, n | 734 |
|  |  |
| Available SpO2 measurements per unique patient, N | 9,302 |
| 1 measurement, n | 8797 |
| 2 measurements, n | 433 |
| 3 measurements, n | 58 |
| 4 measurements, n | 9 |
| 5 measurements, n | 4 |
| 6 measurements, n | 0 |
| 7 measurements, n | 1 |

**Supplementary Table e1. Subject Characteristics in the 7 features models**. The 7 feature models captured 9,990 ICU events from 9,302 unique patients. Variables included in the 7 features machine learning models are SpO2, FiO2, TV, MAP, temperature, PEEP and vasopressor administration. *For subjects older than 89 years, the age was assigned as 90 years of age.

|  | **Entire Dataset 1**  **(9,900 events)** | | **Subset 1 (SpO2 < 97%)**  **(1,390 events)** | |
| --- | --- | --- | --- | --- |
|  | **RMSE** | **BIC** | **RMSE** | **BIC** |
| **Neural Network** | **86.2** | **8873.1** | **66.6** | **1196.8** |
| **LinearRegression** | 92.1 | 9002.9 | 67.1 | 1199.0 |
| **Support Vector Regression** | 87.5 | 8902.3 | 68.5 | 1203.5 |
| **Log-linear** | 130.2 | NA | 73.1 | NA |
| **Non-linear** | 97.7 | NA | 82.4 | NA |

**Supplementary Table e2. RMSE and BIC of the 7 features machine learning models compared to published methods**. The RMSE and BIC for the 7 features models were calculated for the entire dataset (9,900 ICU events) and a subset of the dataset with SpO2 < 97% (1,390 ICU events) and compared to the published log-linear and non-linear models.

|  | **Entire Dataset 1**  **(9,900 events)** | | | | | **Subset 1 (SpO2 < 97%)**  **(1,390 events)** | | | | |
| --- | --- | --- | --- | --- | --- | --- | --- | --- | --- | --- |
|  | **Neural**  **Network** | **Logistic Regression** | **SVM** | **Log-linear** | **Non-linear** | **Neural Network** | **Logistic regression** | **SVM** | **Log-linear** | **Non-linear** |
| **Total, No.** | 9,900 | 9,900 | 9,900 | 9,900 | 9,900 | 1,390 | 1,390 | 1,390 | 1,390 | 1,390 |
| **Sensitivity** | 0.96 | 0.98 | 0.98 | 0.80 | 0.93 | 0.79 | 0.84 | 0.81 | 0.82 | 0.53 |
| **Specificity** | 0.43 | 0.28 | 0.33 | 0.62 | 0.52 | 0.77 | 0.68 | 0.71 | 0.65 | 0.92 |
| **Positive**  **LR** | 1.71 | 1.37 | 1.48 | 2.12 | 1.94 | 3.73 | 2.68 | 2.91 | 2.36 | 6.37 |
| **Negative**  **LR** | 0.09 | 0.07 | 0.06 | 0.33 | 0.13 | 0.28 | 0.24 | 0.27 | 0.27 | 0.51 |
| **Diagnostic**  **OR** | 20.08 | 18.96 | **25.48** | 6.43 | 15.04 | **13.45** | 11.42 | 10.83 | 8.67 | 12.40 |
| **AUROC** | **0.84** | 0.82 | 0.79 | NA | NA | 0.85 | 0.84 | **0.85** | NA | NA |
| **F1** | **0.93** | 0.93 | **0.93** | 0.85 | 0.92 | **0.79** | **0.79** | 0.79 | 0.78 | 0.66 |
| **BIC** | **-2312.40** | -2212.10 | -2243.50 | NA | NA | -221.30 | -216.40 | **-222.30** | NA | NA |

**Supplementary Table e3. Prediction performance of machine learning classification models based on 7 features.** Prediction performance statistics were calculated for the machine learning models based on 7 features and compared to the Log-linear and Non-linear methods for the entire dataset (9,900 ICU events) and for a subset of the events where SpO2 <97% (1,390 ICU events). Variables included in the 7 features machine learning models are SpO2, FiO2, TV, MAP, temperature, PEEP and vasopressor administration.


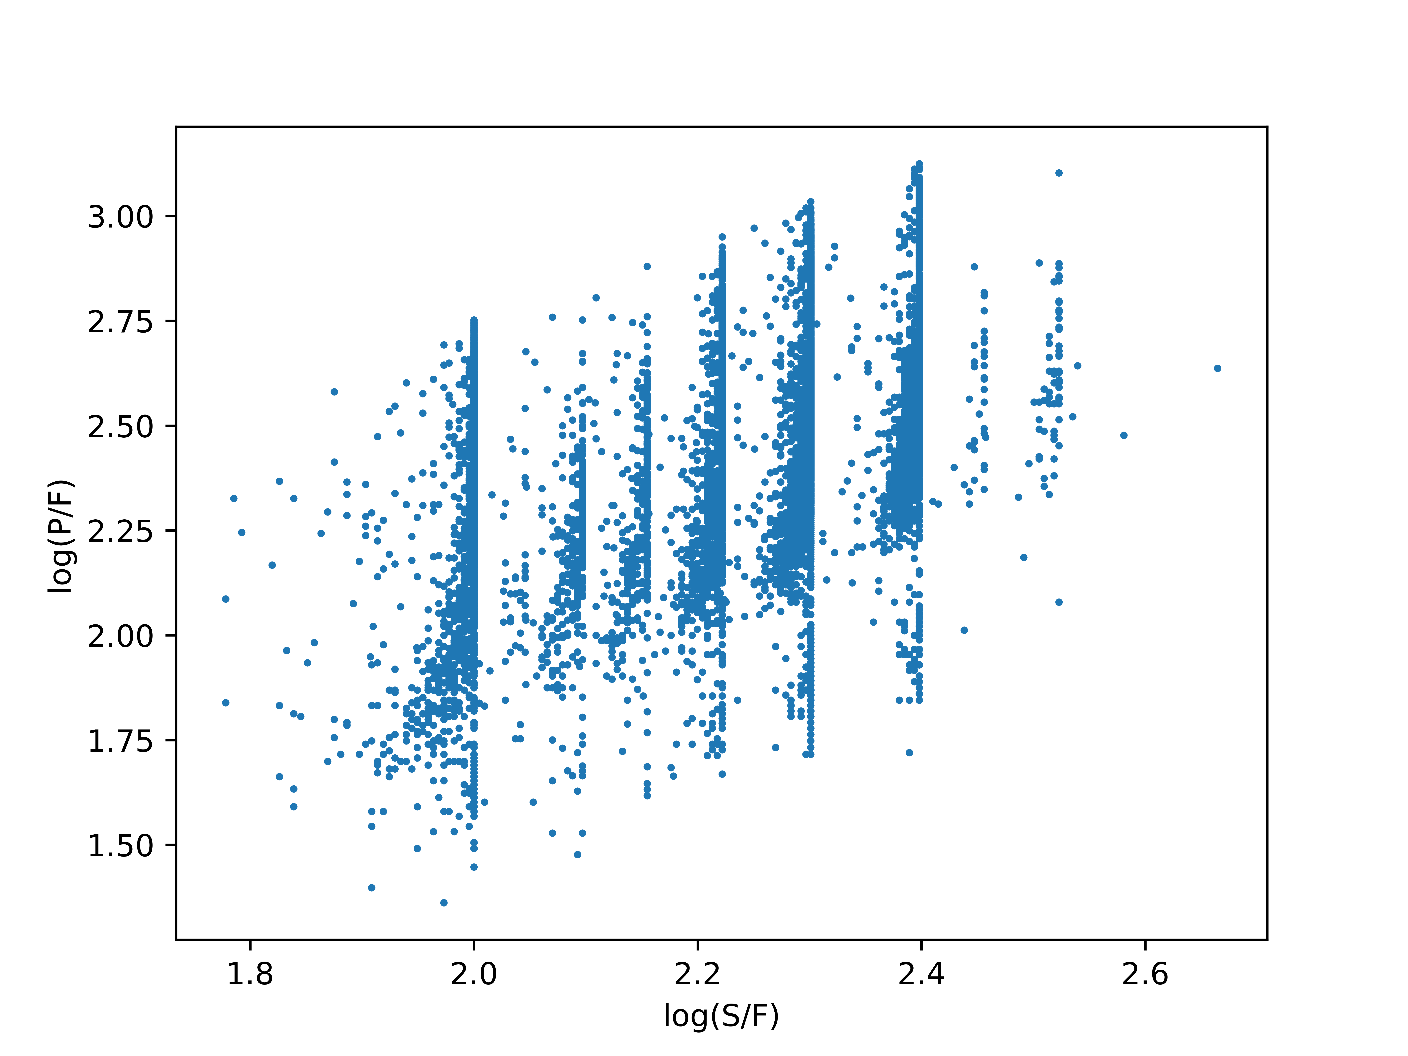


**Supplementary Figure e1. Log linear regression between SpO2/FIO2 (S/F) and PaO2/FIO2 (P/F).** Thelog-linear relationship between the transformed logarithmic value of the SF and PF ratios is shown. Dataset 1 includes 9,900 ICU events. R2 = 0.21. Each point represents a unique ICU event.


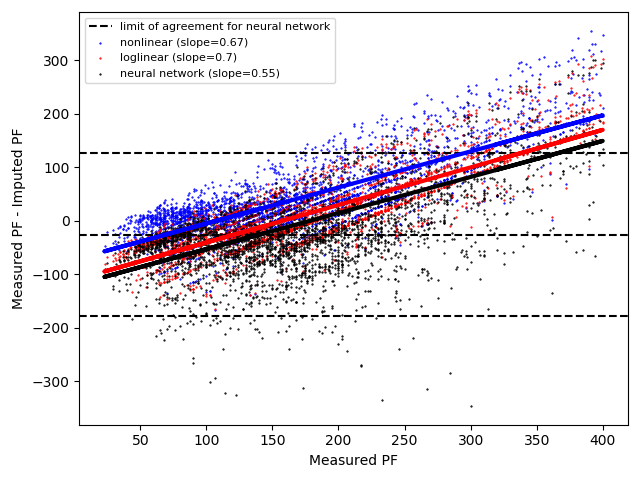


**Supplementary Figure e2: Bland-Altman Plots of imputed versus measured PaO2/FIO2 ratios comparing the published equations and the 3 features Neural Network machine-learning algorithm for Subset 2 (SpO2 < 97%).** Bland-Altman plots of imputed versus measured PaO2/FiO2 ratio comparing the Neural Network machine learning algorithm using 3 features to the published log-linear and non-linear equations. Subset 2 of the entire dataset 2 where SpO2 <97% (3,280 ICU events) is shown and the slope of each least squared line is reported. Each point represents a single ICU event.
